# Supplementary material for: Hadoop Oriented Smart Cities Architecture
Source: Sensors (Basel). 2018 Apr 12;18(4):1181. doi: 10.3390/s18041181 (PMC5948833; doi:10.3390/s18041181)
Supplement: Supplementary file 1 [file sensors-18-01181-s001.xlsx]

## Sheet: Criterias
	For more details: Review->Show All comments
	Datasets cand be downloaded from: https://drive.google.com/file/d/1VVdl9SdPqs2VGwySbs4ByLrH2RvGBvLb/view?usp=sharing
		Hive with MapReduce	Hive with Tez	Hive with Spark	Oraloader	Sqoop	Cassandra + Presto	HBase + Pheonix	Spark Streaming	Storm	Ambari	Hue
	1. Speed increments when scaling to a cluster with more nodes (50%)	60.08	74.16	67.7	0	0	51.3	75.85	100	100	0	0
	2. Processing speed over the datasets (15%)	34.8	100	62.2	100	93.23	100	34.43	99	100	0	0
	3. The reusability of the code between the components of the architecture (15%)	50	50	50	10	50	75	75	75	50	0	0
	4. Innovations in the past 36 months (e.g. DataFrames in Spark) or important extra features (10%)	75	100	75	0	15	0	0	100	0	15	0
	5. Releases in the past 12 months (5%)	100	100	100	75	75	100	100	100	100	100	100
	6. Support/interest shown in online communities	100	100	100	50	100	100	75	100	71.5	100	75
	Score	60.26	79.58	68.18	22.75	31.7345	61.9	63.0895	96.1	81.075	11.5	8.75

## Sheet: Spark, Hive Structures&Queries
RC_2017-03.sentiment is a tab separated file that has 1.1 GB and it is stored in HDFS. It was obtained by calculating the sentiment scores for the posts in file RC_2017-03 (41GB, uncompressed)
Note: there are slight variations between HiveQL/Spark SQL and Oracle. For example, in HiveQL/Spark SQL, TRUNC only accepts DATE and returns STRING. By comparison, in Oracle, TRUNC can be used on NUMBER and returns NUMBER and on DATE and returns DATE.
	Oracle 11g (for comparison)	Hive, using different execution engines: set hive.execution.engine=mr; set hive.execution.engine=tez; set hive.execution.engine=spark;	Spark 2.0	Spark 2.0 (pyspark, spark-submit) connected to Hive
Dataset 2 (see data and methods)	create table sentiment_ratings( roundedFinalScore number(20,10), maxPosScore number(20,10), maxNegScore number(20,10), postid varchar2(100)) PARTITION BY HASH(postid);	create external table sentiment_ratings( roundedFinalScore decimal(10,8), maxPosScore decimal(10,8), maxNegScore decimal(10,8), postid string) row format delimited fields terminated by '\t' stored as textfile location '/user/article/sentiment';	from pyspark.sql.types import StructField,StringType,FloatType,StructType from pyspark.sql import SparkSession spark = SparkSession.builder.appName('Basics').getOrCreate() data_schema = [StructField('roundedFinalScore',FloatType(),True), StructField('maxPosScore',FloatType(),True), StructField('maxNegScore',FloatType(),True), StructField('postId',StringType(),True)] sent_struct = StructType(field…	from pyspark.sql.types import StructField,StringType,FloatType,StructType from pyspark.sql import SparkSession warehouseLocation = "file:${system:user.dir}/spark-warehouse" spark = SparkSession.builder.appName("SparkHive").config("spark.sql.warehouse.dir", warehouseLocation).enableHiveSupport().getOrCreate()
Query 1	select count(*) postsNumber, sum(case when roundedFinalScore is null then 1 else 0 end) nulls, sum(case when roundedFinalScore>=0.5 then 1 else 0 end) positive, sum(case when roundedFinalScore>=0.95 then 1 else 0 end) pure_positive, sum(case when roundedFinalScore<=-0.5 then 1 else 0 end) negative, sum(case when roundedFinalScore<=-0.95 then 1 else 0 end) pure_negative, sum(case when roundedFinal…	select count(*) postsNumber, sum(case when roundedFinalScore is null then 1 else 0 end) nulls, sum(case when roundedFinalScore>=0.5 then 1 else 0 end) positive, sum(case when roundedFinalScore>=0.95 then 1 else 0 end) pure_positive, sum(case when roundedFinalScore<=-0.5 then 1 else 0 end) negative, sum(case when roundedFinalScore<=-0.95 then 1 else 0 end) pure_negative, sum(case when roundedFinal…	res = spark.sql("""select count(*) postsNumber, sum(case when roundedFinalScore is null then 1 else 0 end) nulls, sum(case when roundedFinalScore>=0.5 then 1 else 0 end) positive, sum(case when roundedFinalScore>=0.95 then 1 else 0 end) pure_positive, sum(case when roundedFinalScore<=-0.5 then 1 else 0 end) negative, sum(case when roundedFinalScore<=-0.95 then 1 else 0 end) pure_negative, sum(cas…	res = spark.sql("""select count(*) postsNumber, sum(case when roundedFinalScore is null then 1 else 0 end) nulls, sum(case when roundedFinalScore>=0.5 then 1 else 0 end) positive, sum(case when roundedFinalScore>=0.95 then 1 else 0 end) pure_positive, sum(case when roundedFinalScore<=-0.5 then 1 else 0 end) negative, sum(case when roundedFinalScore<=-0.95 then 1 else 0 end) pure_negative, sum(cas…
Query 2	select interval_floor, concat(concat(interval_floor, ' to '),interval_ceiling) as ratings_interval, count(*) as count from (select trunc(roundedFinalScore,1)-0.1 as interval_floor, trunc(roundedFinalScore,1) as interval_ceiling from sentiment_ratings where roundedFinalScore<0 union all select trunc(roundedFinalScore,1) as interval_floor, trunc(roundedFinalScore,1)+0.1 as interval_ceiling from sen…	select interval_floor, concat(interval_floor, ' to ',interval_ceiling) as ratings_interval, count(*) as count from ( select (cast(roundedFinalScore*10 as int)/10-0.1) as interval_floor, cast(roundedFinalScore*10 as int)/10 as interval_ceiling from sentiment_ratings where roundedFinalScore<0 union all select cast(roundedFinalScore*10 as int)/10 as interval_floor, cast(roundedFinalScore*10 as int)/…	res = spark.sql("""select interval_floor, concat(interval_floor, ' ',interval_ceiling) as ratings_interval, count(*) as count from (select trunc(roundedFinalScore,1) as interval_floor, trunc(roundedFinalScore,1) + 0.1 as interval_ceiling from sentiment_ratings) a group by interval_floor, interval_ceiling order by interval_floor""")	res = spark.sql("""select interval_floor, concat(interval_floor, ' ',interval_ceiling) as ratings_interval, count(*) as count from (select trunc(roundedFinalScore,1) as interval_floor, trunc(roundedFinalScore,1) + 0.1 as interval_ceiling from sentiment_ratings) a group by interval_floor, interval_ceiling order by interval_floor""") res.show()
Dataset 3 (see data and methods)		create external table if not exists xml_documents (record string) row format delimited lines terminated by '\n' location '/user/article/xml';
Query 3	N/A	select xpath_int(record, "/record/OrderValue") a, xpath_string(record, "/record/Customer") b FROM xml_documents order by a limit 50;	N/A	N/A
Query 4 (create+select)		CREATE TABLE xml_documents_split AS SELECT xpath_string(record, "/record/Customer") as customer, xpath_int(record, "/record/OrderValue") as order_value, split(xpath_string(record, "/record/ProductIDs"), ",") as product_id FROM xml_documents;
Query 5		SELECT purchase_date, product_no, COUNT(product_no) no_products FROM xml_documents_split LATERAL VIEW explode(product_id) product_table as product_no GROUP BY purchase_date,product_no order by no_products desc limit 50;
Note: Hive-on-MR is deprecated in Hive 2 and may not be available in the future versions.
Obs: Query 3 runs from Hive (using HiveQL) using the Spark execution engine but not from Spark (using Spark SQL) nor from Oracle.

## Sheet: Spark, Hive Results
	Execution Time (sec)	HiveQL with MapReduce as execution engine
		Query 1	Query 2	Query 3	Query 4	Query 5
	1 node	139.9	102.467	7150	2440	48.15
	3 node cluster	80.9	100.69	6107	1401	40.7
	5 node custer	57.16	85.04	5803	1190	32.5
	Execution Time (sec)	HiveQL with Tez as execution engine
		Query 1	Query 2	Query 3	Query 4	Query 5
	1 node	219	118.53	1487	1250.93	27.07
	3 node cluster	51.67	79.48	780.53	708	20.1
	5 node custer	43.7	40.25	530.38	600	12.5
	Execution Time (sec)	HiveQL with Spark as execution engine
		Query 1	Query 2	Query 3	Query 4	Query 5
	1 node	263	123.98	2967.8	2001	31.644
	3 node cluster	80	101.21	1735.6	1380	24.3
	5 node custer	51	83.7	1250.3	1081	18.2
	Execution Time (sec)	Spark 2.1 (spark-submit, Spark SQL over HDFS stored file)			Spark 2.1 (spark-submit, Spark SQL over the Hive stored table)
		Query 1	Query 2	Query 3,4,5	Query 1	Query 2	Query 3,4,5
	1 node	13	25	n/a	12	23	n/a
	3 node cluster	48.98	80	n/a	40.2	61	n/a
	5 node custer	38.3	57.9	n/a	31.7	43.5	n/a
		Note: The XML oriented SQL functions from queries 3, 4 and 5 are not currently compatible with Spark SQL
	Execution Time	Oracle 12c non-CDB (for comparison)
		Query 1	Query 2	Query 3,4,5
	1 node	22.131	29.56	n/a
		Note: The XML oriented SQL functions from queries 3, 4 and 5 are not currently compatible with Oracle SQL. Predefined packages such as DBMS_XMLPARSER could pe used to access XML documents.

## Sheet: NoSQL Structures and Queries
	Hbase	Phoenix	Drill	Cassandra + Presto
Dataset 1 (see data and methods)		create table road_features_poi( road_seg_id decimal primary key, road_seg_length decimal, road_seg_lanes integer , road_seg_speed_limit decimal, direction integer, lev integer, tortuosity integer, no_connections decimal, no_schools decimal, no_companies decimal, no_banks_atms decimal, no_shopping_centers decimal, no_restaurants decimal, no_gas_stations decimal, no_scenic_spots decimal, no_hotels …		create table road_features_poi( road_seg_id decimal, road_seg_length decimal, road_seg_lanes int , road_seg_speed_limit decimal, direction int, lev int, tortuosity int, no_connections decimal, no_schools decimal, no_companies decimal, no_banks_atms decimal, no_shopping_centers decimal, no_restaurants decimal, no_gas_stations decimal, no_scenic_spots decimal, no_hotels decimal, no_transportations …
Query 1		select s.road_seg_id, s.time_slot_id, sum(no_vehicles) total_no_v, avg(s.avg_travel_speed) tot_avg,stddev_pop(s.no_vehicles) pop_st_dev from speed s join road_features_poi r on s.road_seg_id=r.road_seg_id group by s.road_seg_id, s.time_slot_id order by total_no_v desc limit 10;		select s.road_seg_id, s.time_slot_id, sum(no_vehicles) total_no_v, avg(s.avg_travel_speed) tot_avg,stddev_pop(s.no_vehicles) pop_st_dev from speed s join road_features_poi r on s.road_seg_id=r.road_seg_id group by s.road_seg_id, s.time_slot_id order by total_no_v desc limit 10;
Query 2		select d.road_seg_id,d.time_slot_id,t.start_time,t.end_time,r.sum_no_pois,r.road_seg_length from day_speed_history d inner join road_features_poi r on d.road_seg_id=r.road_seg_id inner join time_slots t on d.time_slot_id=t.time_slot_id order by d.road_seg_id desc limit 100;		select d.road_seg_id,d.time_slot_id,t.start_time,t.end_time,r.sum_no_pois,r.road_seg_length from day_speed_history d inner join road_features_poi r on d.road_seg_id=r.road_seg_id inner join time_slots t on d.time_slot_id=t.time_slot_id order by d.road_seg_id desc limit 100;
Dataset 2 (see data and methods)	create 'SENTIMENT_RATINGS','cf' hbase org.apache.hadoop.hbase.mapreduce.ImportTsv -Dimporttsv.columns="cf:ROUNDEDFINALSCORE,cf:MAXPOSSCORE,cf:MAXNEGSCORE,HBASE_ROW_KEY,POSTID" SENTIMENT_RATINGS hdfs:///user/article/sentiment/RC_2017-03.sentiment	CREATE TABLE SENTIMENT_RATINGS( "cf"."ROUNDEDFINALSCORE" DECIMAL(5,4), "cf"."MAXPOSSCORE" DECIMAL(5,4), "cf"."MAXNEGSCORE" DECIMAL(5,4), "POSTID" VARCHAR PRIMARY KEY );	Doesn't need e separate create table	CREATE TABLE SENTIMENT_RATINGS( MAXNEGSCORE DECIMAL, MAXPOSSCORE DECIMAL, ROUNDEDFINALSCORE DECIMAL, POSTID TEXT, PRIMARY KEY (POSTID));
Query 3		select count(*) postsNumber, sum(case when roundedFinalScore is null then 1 else 0 end) nn, sum(case when roundedFinalScore>=0.5 then 1 else 0 end) positive, sum(case when roundedFinalScore>=0.95 then 1 else 0 end) pure_positive, sum(case when roundedFinalScore<=-0.5 then 1 else 0 end) negative, sum(case when roundedFinalScore<=-0.95 then 1 else 0 end) pure_negative, sum(case when roundedFinalSco…	select count(*) postsNumber, sum(case when roundedFinalScore is null then 1 else 0 end) nn, sum(case when roundedFinalScore>=0.5 then 1 else 0 end) positive, sum(case when roundedFinalScore>=0.95 then 1 else 0 end) pure_positive, sum(case when roundedFinalScore<=-0.5 then 1 else 0 end) negative, sum(case when roundedFinalScore<=-0.95 then 1 else 0 end) pure_negative, sum(case when roundedFinalSco…	select count(*) postsNumber, sum(case when roundedFinalScore is null then 1 else 0 end) nn, sum(case when roundedFinalScore>=0.5 then 1 else 0 end) positive, sum(case when roundedFinalScore>=0.95 then 1 else 0 end) pure_positive, sum(case when roundedFinalScore<=-0.5 then 1 else 0 end) negative, sum(case when roundedFinalScore<=-0.95 then 1 else 0 end) pure_negative, sum(case when roundedFinalSco…
Query 4		select interval_floor, interval_floor || ' to '|| interval_ceiling as ratings_interval, count(*) as count from (select trunc(roundedFinalScore,1)-0.1 as interval_floor, trunc(roundedFinalScore,1) as interval_ceiling from default.sentiment_ratings where roundedFinalScore<0 union all select trunc(roundedFinalScore,1) as interval_floor, trunc(roundedFinalScore,1)+0.1 as interval_ceiling from default…	select interval_floor, interval_floor || ' to '|| interval_ceiling as ratings_interval, count(*) as count from (select trunc(roundedFinalScore,1)-0.1 as interval_floor, trunc(roundedFinalScore,1) as interval_ceiling from sentiment_ratings where roundedFinalScore<0 union all select trunc(roundedFinalScore,1) as interval_floor, trunc(roundedFinalScore,1)+0.1 as interval_ceiling from sentiment_ratin…	select interval_floor, interval_floor || ' to '|| interval_ceiling as ratings_interval, count(*) as count from ( select (cast(roundedFinalScore*10 as int)/10-0.1) as interval_floor, cast(roundedFinalScore*10 as int)/10 as interval_ceiling from cassandra.sentiment.sentiment_ratings where roundedFinalScore<0 union all select cast(roundedFinalScore*10 as int)/10 as interval_floor, cast(roundedFinalS…

## Sheet: NoSQL Results
	Hbase and Phoenix				Cassandra and Presto
	Query 1	Query 2	Query 3	Query 4	Query 1	Query 2	Query 3	Query 4
3 nodes processing speed (sec)	48.5	2.32	80.2	78.5	40.1	2	25	13
5 nodes processing speed (sec)	27.9	1.79	58	50.5	34.3	1.85	20	10

## Sheet: OLH, Sqoop Results
		Using Oraloader-3.9.0			Using Sqoop 1.4.6.2.6.3.0-235
		1 node	3 nodes	5 nodes	1 node	3 nodes	5 nodes
	Export the sentiment_ratings table (1.1GB) from Hive to Oracle (sec)	993	901	850	1098	950	900
	Import the sentiment_ratings table (1.1GB) from Oracle into Hive (sec)	314	500	400	550	450	407
	Import the sentiment_ratings table (1.1GB) from Oracle into Hbase (sec)	290	280	279	301	290	285
